# Supplementary material for: Fabrication of Metallic Superhydrophobic Surfaces with Tunable Condensate Self-Removal Capability and Excellent Anti-Frosting Performance
Source: MDPI journal article supplement (doi:10.3390/nano12203655), 2022-10-18
Supplement: s1 [file s1]

Archive with 7 entries (7 files):
- nanomaterials-1930985-Supplementary materials.pdf
- Video S1.mp4
- Video S2.mp4
- Video S3.mp4
- Video S4.mp4
- Video S5.mp4
- Video S6.mp4
